# Supplementary material for: Densification pretreatment with a limited deep eutectic solvent triggers high-efficiency fractionation and valorization of lignocellulose
Source: Royal Society of Chemistry journal article supplement (doi:10.1039/d3gc02776g), 2023-01-01
Supplement: d3gc02776g1.pdf [file d3gc02776g1.pdf]

## **Supplementary Materials**

### **Densification pretreatment with limited deep eutectic solvent triggers high-efficiency fractionation and valorization of lignocellulose**

Guannan Shen, Xinchuan Yuan, Yin Cheng, Sitong Chen, Zhaoxian Xu, Mingjie Jin\*

School of Environmental and Biological Engineering, Nanjing University of Science and Technology, 200 Xiaolingwei Street, Nanjing 210094, China.

\*Corresponding author. Email: [jinmingjie@njust.edu.cn](mailto:jinmingjie@njust.edu.cn)

Table S1 Strategies for FBE SSCF at 30% solid loading with different enzyme dosages

| Enzyme loading | Pre-hydrolysis                          | FBE SSCF time |             |             |
|----------------|-----------------------------------------|---------------|-------------|-------------|
|                | 24 h                                    | 0 h           | 12 h        | 24 h        |
| 10 mg/g glucan | 23% dw <sup>a</sup><br>90% <sup>b</sup> | 4% dw<br>10%  | 3% dw<br>0% | 0% dw<br>0% |
| 15 mg/g glucan | 23% dw<br>90%                           | 4% dw<br>10%  | 3% dw<br>0% | 0% dw<br>0% |
| 20 mg/g glucan | 20% dw<br>90%                           | 6% dw<br>10%  | 2% dw<br>0% | 2% dw<br>0% |

<sup>a</sup>: biomass solid loading

<sup>b</sup>: enzyme loading

Table S2 Performances of traditional DES pretreatment and DLCA(DES) pretreatment on lignin fractionation and saccharification.

| DESs<br>(HBA:HBD)                       | Biomass            | Pretreatment Conditions |               |                     | delignification<br>(%) | Enzyme &<br>Enzymatic<br>conditions                                                                         | Saccharification<br>performance  | References |
|-----------------------------------------|--------------------|-------------------------|---------------|---------------------|------------------------|-------------------------------------------------------------------------------------------------------------|----------------------------------|------------|
|                                         |                    | Temperature<br>(°C)     | Time<br>(min) | DES<br>dosage       |                        |                                                                                                             |                                  |            |
| ChCl:OA:EG<br>(1:0.2:2)                 | Corn<br>stover     | 130                     | 60            | 2.06 g/g<br>biomass | 75.27                  | SL=3%, Cellic<br>CTec3 HS, 10<br>mg protein/g<br>glucan                                                     | glucan<br>conversion of<br>96.4% | This study |
| ChCl:Gly (1:2)                          | Sorghum<br>bagasse | 180                     | 40            | 1 g/g<br>biomass    | 14.3                   | SL=1%, Cellic®<br>CTec2, 20 mg<br>protein/g glucan,<br>Cellic® HTec2,<br>0.26 mg enzyme<br>protein/g glucan | glucose yield of<br>85%          | 1          |
| ChCl:BDO:AlCl <sub>3</sub><br>(25:50:1) | Moso<br>bamboo     | 110                     | 60            | 3.2 g/g<br>biomass  | 63.1                   | SL=2.5%, 25<br>PFU/g glucan<br>cellulase and<br>150 U/g xylan<br>xylanase                                   | glucose yield of<br>94.8%        | 2          |
| BTMAC:LA (1:2)                          | Corn cob           | 140                     | 120           | 20 mL/g<br>biomass  | 63.4                   | SL=2%, 15<br>FPU/g substrate<br>of cellulase                                                                | glucose yield of<br>94.0%        | 3          |

|                                    |                   |     |     |                   |      |                                                             |                                  |   |
|------------------------------------|-------------------|-----|-----|-------------------|------|-------------------------------------------------------------|----------------------------------|---|
| ChCl:p-hydroxybenzoic acid (3:2)   | Poplar            | 160 | 180 | 10 g/g biomass    | 69   | SL=2%,<br>Novozymes<br>CTec2, 70 mg<br>protein/g<br>biomass | glucan<br>conversion of<br>90.8% | 4 |
| ChCl:LA (1:2)                      | Poplar<br>sawdust | 130 | 90  | 10 g/g<br>biomass | 66.4 | SL=5%, 30<br>FPU/g glucan                                   | glucose yield of<br>75.8%        | 5 |
| ChCl:<br>monoethanolamine<br>(1:6) | Wheat<br>straw    | 70  | 540 | 20 g/g<br>biomass | 71.4 | SL=1%                                                       | glucan<br>conversion of<br>89.8% | 6 |
| ChCl:LA (1:2)                      | Poplar            | 140 | 180 | 20 g/g<br>biomass | 51.3 | SL=2%, Cellic<br>CTec3, 20 mg                               | sugar yield of<br>71.6%          | 7 |
| ChCl:GA (2:1)                      | Poplar            | 140 | 180 | 20 g/g<br>biomass | 50   | protein /g<br>cellulose                                     | sugar yield of<br>69.1%          | 7 |

Table S3 The position of some common FTIR absorption bands and the relative changes of absorption intensity<sup>a</sup> in several samples.

| Band position | Assignment                                | Samples |       |              |
|---------------|-------------------------------------------|---------|-------|--------------|
|               |                                           | D-LCS   | D-PCS | DLCA(DES)-CS |
| 3340          | O-H stretching                            | 0.02    | 0.25  | 0.38         |
| 2915          | C-H stretching                            | 0.13    | 0.30  | 0.44         |
| 1595          | Aromatic ring stretching                  | 0.26    | 0.37  | 0.56         |
| 1513          | Aromatic ring vibration                   | 0.30    | 0.41  | 0.61         |
| 1245          | C-O adsorption                            | 0.28    | 0.33  | 0.59         |
| 1105          | C-O vibrations of crystalline cellulose   | 0.09    | 0.42  | 0.37         |
| 890           | $\beta$ -glycosidic linkages in cellulose | -0.04   | 0.12  | 0.29         |

<sup>a</sup>: Relative change =  $\frac{\text{intensity of untreated LCS} - \text{intensity of pretreated sample}}{\text{intensity of untreated LCS}} * 100\%$ ; where positive number indicates reduction.

---

## References

1. B. Ai, W. Li, J. Woomer, M. Li, Y. Pu, Z. Sheng, L. Zheng, A. Adedeji, A. J. Ragauskas and J. Shi, *Green Chemistry*, 2020, **22**, 6372-6383.
2. J. Cheng, C. Huang, Y. Zhan, X. Liu, J. Wang, X. Meng, C. G. Yoo, G. Fang and A. J. Ragauskas, *Green Chemistry*, 2023, **25**, 1571-1581.
3. Z. Guo, Q. Zhang, T. You, X. Zhang, F. Xu and Y. Wu, *Green Chemistry*, 2019, **21**, 3099-3108.
4. Y. Wang, X. Meng, K. Jeong, S. Li, G. Leem, K. H. Kim, Y. Pu, A. J. Ragauskas and C. G. Yoo, *ACS Sustainable Chemistry & Engineering*, 2020, **8**, 12542-12553.
5. Y. Su, C. Huang, C. Lai and Q. Yong, *Bioresour Technol*, 2021, **321**, 124471.
6. Z. Zhao, X. Chen, M. F. Ali, A. A. Abdeltawab, S. M. Yakout and G. Yu, *Bioresour Technol*, 2018, **263**, 325-333.
7. Y. Song, X. Shi, S. Ma, X. Yang and X. Zhang, *Cellulose*, 2020, **27**, 8301-8315.
